# Supplementary material
Source: Springer Nature journal article supplement (https://www.springermedizin.de/resource/supplementary/13256_2011_1934_MOESM2_ESM.pdf/9648830)

**a**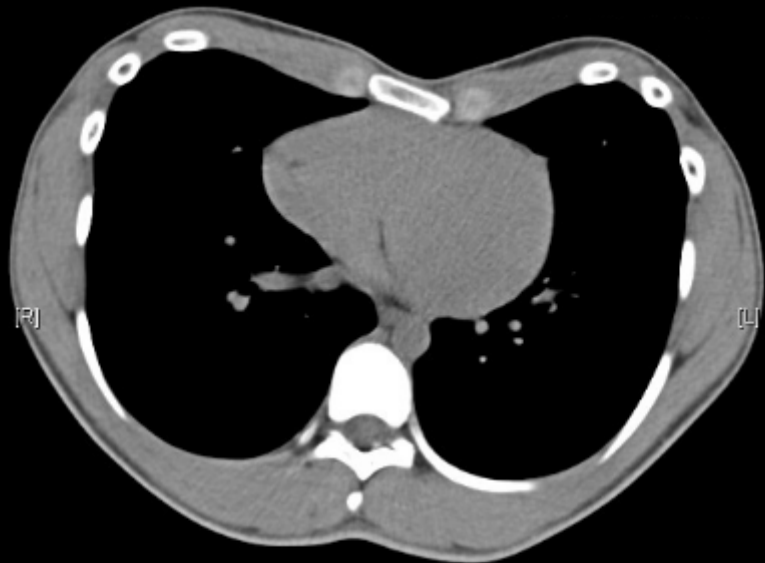**b**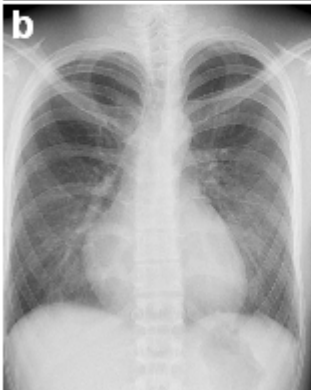**c**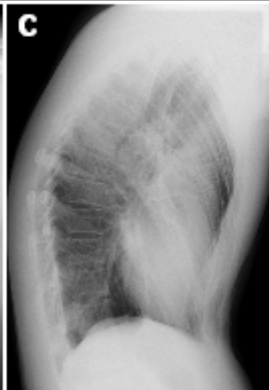**d**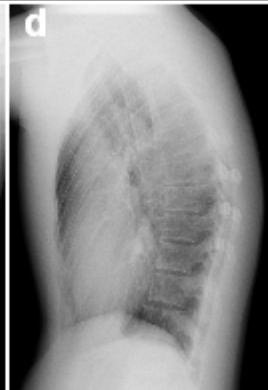

Supplement: MOESM2 [file 9648830]
